# Supplementary material for: Anti-CTLA-4 Antibodies Induce a Sustained, NK Cell- and T Cell-Dependent Vaccinal Effect for Tumor Prevention and Therapy
Source: Research Square preprint supplement (doi:10.21203/rs.3.rs-8432100/v1), 2026-01-09
Supplement: Supplementary file 1 [file 8b3e25cd4495c04d7983de26.pdf]

**Supplemental Figure 1**

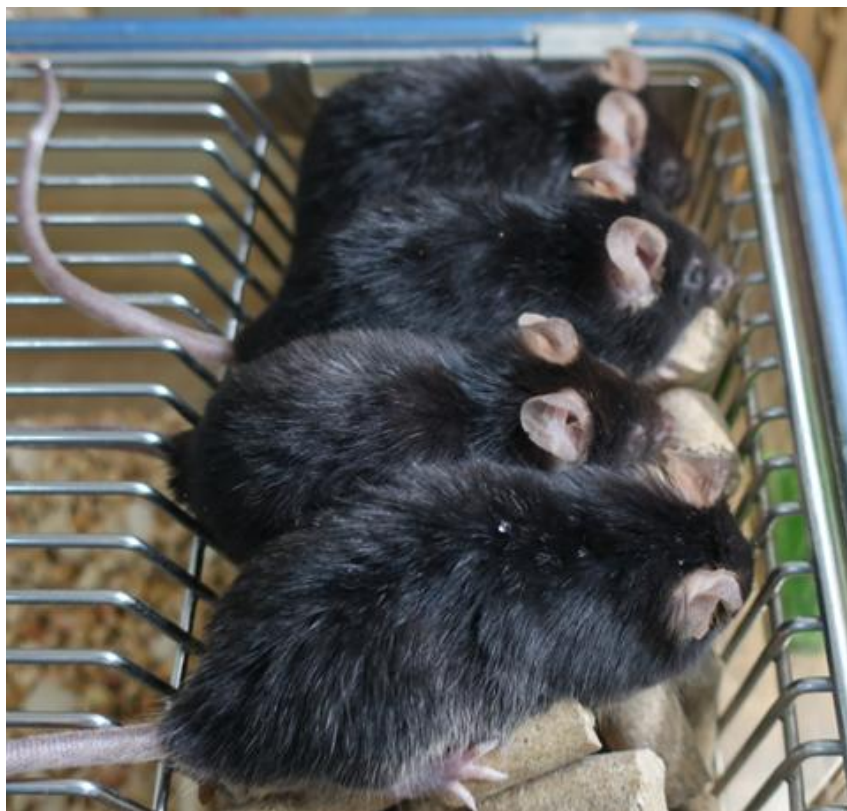

**Picture of mice of the long-term (50 weeks) cured mice**

**Supplemental Figure 2**

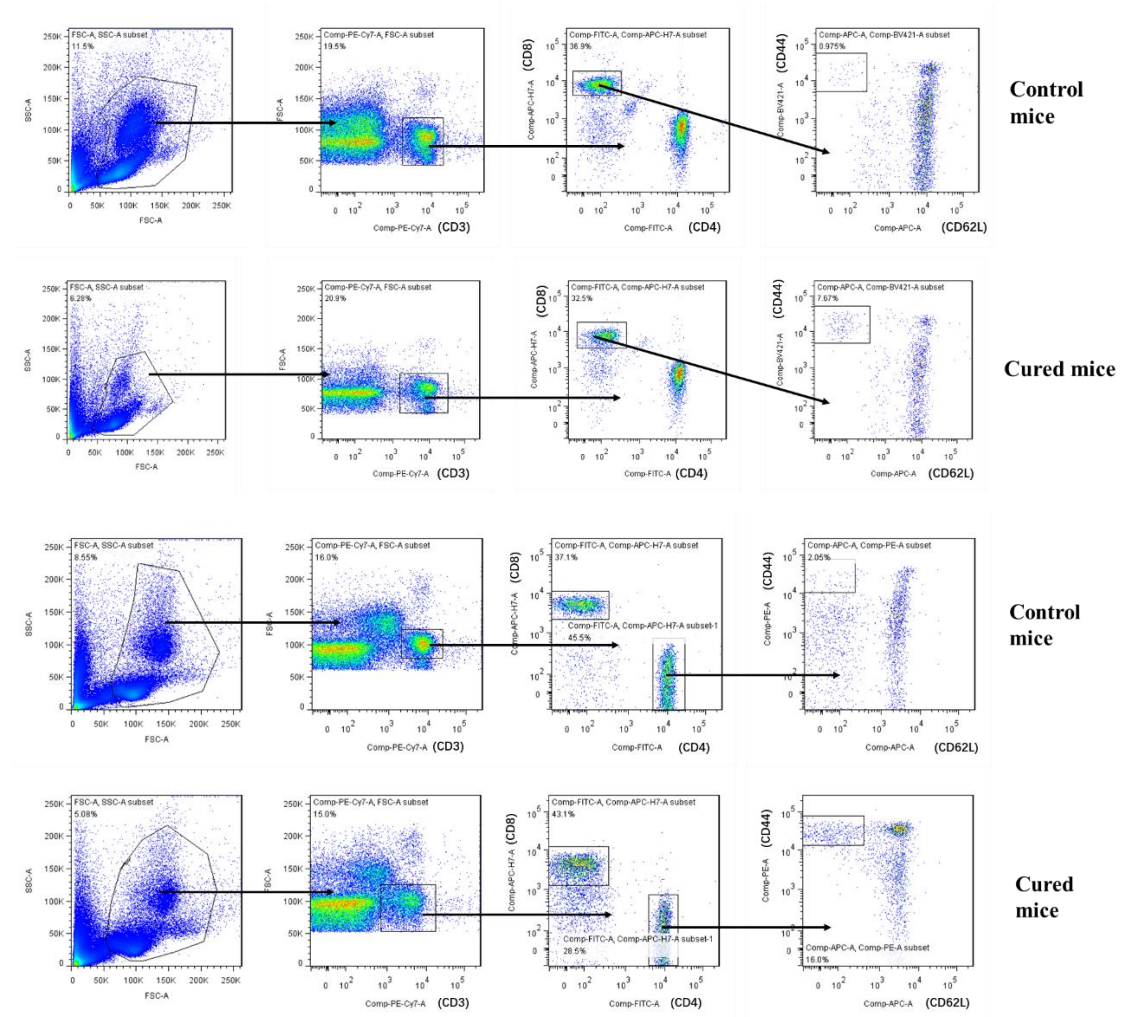

**The ratio of CD44+/CD62L—in CD8+ and CD4+ T cells of control or anit-CTLA-4 antibody-cured mice. FACS plots are shown as representative examples of the gating strategy used in each experiment, combined with plots showing the comparison of the ratio of CD44+/CD62L—in CD8+ (A)T cells and CD4+ (B) in control or cured (B) mice.**

**Supplemental Figure 3**

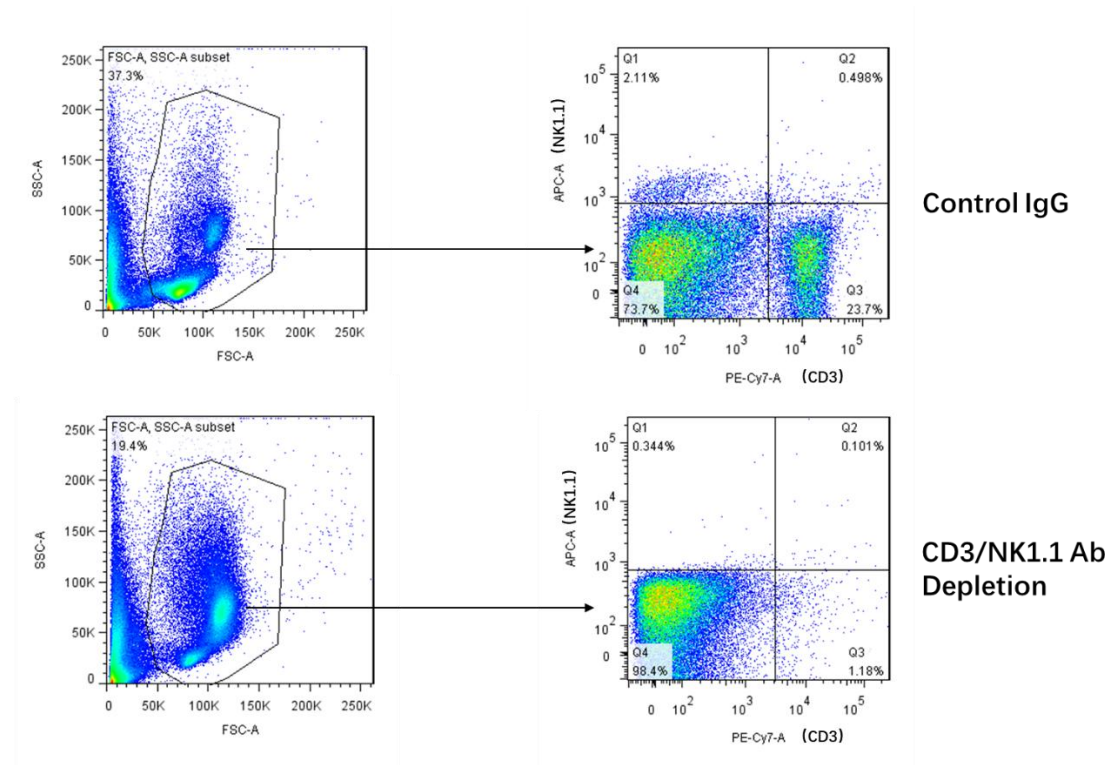

**CD3<sup>+</sup> T cells and NK cells decreased significantly in mice treated with anti-CD3 antibody and anti-NK1.1 antibody.** FACS plots are shown as a representative example of the gating strategy used in the comparison of the ratio of CD3<sup>+</sup> T and NK cells in control IgG or anti-CD3/NK1.1 antibody-treated mice.

Supplemental Figure 4

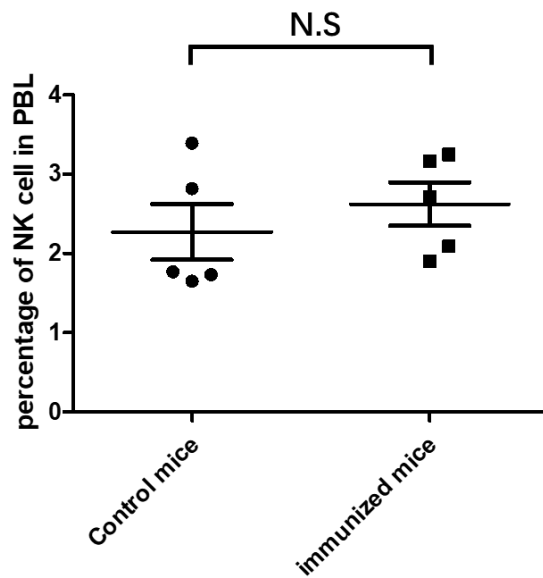

The ratio of NK cells did not alter significantly in the PBL of the CTLA-4-immunized mice. The ratio of NK cell in PBL of the control mice or CTLA-4-immunized mice were analyzed by FACS.

Supplemental Figure 5

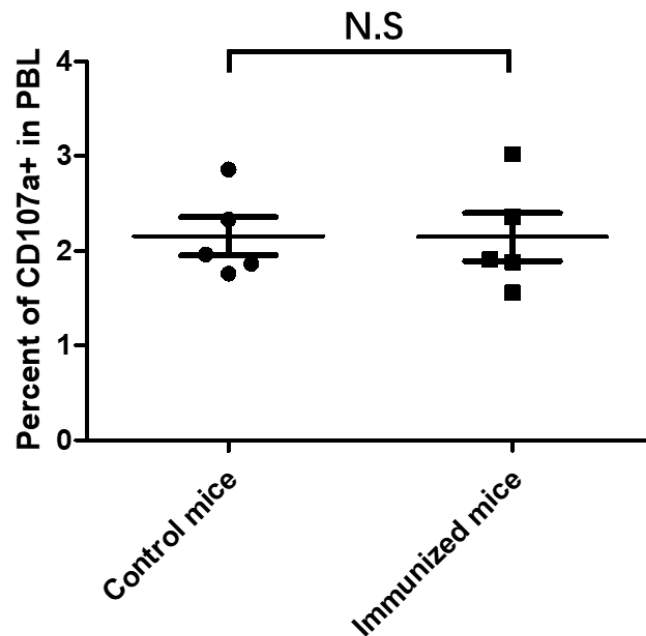

The ratio of CD107a+ immune cells did not alter significantly in the PBL of the CTLA-4-immunized mice. The ratio of CD107a+ cell in PBL of the control mice or CTLA-4-immunized mice were analyzed by FACS.
